# Supplementary material for: Handlungsalgorithmus: Bauchpositionierung bei kritisch kranken Patienten
Source: Springer Nature journal article supplement (doi:10.1007/s00063-024-01146-8), 2024-05-08
Supplement: MOESM1 [file 27068766]

## Bauchlage im ARDS

|                         |                                                                                                                                                                                                                                                                                                                                                                                                                                                                                                                                                                                                                                                                                                                           |
|-------------------------|---------------------------------------------------------------------------------------------------------------------------------------------------------------------------------------------------------------------------------------------------------------------------------------------------------------------------------------------------------------------------------------------------------------------------------------------------------------------------------------------------------------------------------------------------------------------------------------------------------------------------------------------------------------------------------------------------------------------------|
| <b>Definition</b>       | <p>Bauchlage bedeutet die Drehung der PatientIn aus der Rückenlage um:</p> <ol style="list-style-type: none"> <li>I. 180° → komplette Bauchlage (zu bevorzugen)</li> <li>II. 135°-180° → inkomplette Bauchlage</li> </ol>                                                                                                                                                                                                                                                                                                                                                                                                                                                                                                 |
| <b>Indikation</b>       | <p>Akutes Lungenversagen (ARDS)<br/>Oxygenierungsindex <math>\leq 150</math> mmHg trotz erhöhtem PEEP</p> <p style="text-align: center;">Horowitz – Quotient: <math>\frac{paO_2}{FiO_2}</math></p> <ul style="list-style-type: none"> <li>▪ unverzügliche Umsetzung der Bauchlage nach Indikationsstellung</li> </ul>                                                                                                                                                                                                                                                                                                                                                                                                     |
| <b>Kontraindikation</b> | <ul style="list-style-type: none"> <li>▪ Instabile Wirbelsäule</li> <li>▪ Schwere, operative Gesichtstraumen</li> <li>▪ Zerebrale Läsionen (wenn keine kontinuierliche oder engmaschige Kontrolle des Hirndruckes möglich ist)</li> <li>▪ Kreislaufrelevante Herzrhythmusstörungen</li> <li>▪ Individuelles Abwägen bei abdominell- chirurgischen Eingriffen</li> </ul> <p><u>Besonderheit:</u><br/>Bei einem Risiko für einen erhöhten Hirndruck muss dieser während der Bauchlage kontinuierlich überwacht werden. Der Kopf darf dabei nicht seitlich gelagert sein.</p> <p><b>CAVE:</b> Im Einzelfall sollten Nutzen &amp; Risiko individuell abgewogen werden<br/>→ ggf. inkomplette Bauchlage in Erwägung ziehen</p> |
| <b>Ziele</b>            | <ul style="list-style-type: none"> <li>▪ Verbesserung des pulmonalen Gasaustauschs<br/>→ Veränderung des Ventilations- Perfusionsverhältnisses<br/>→ Steigerung der Oxygenierung</li> <li>▪ Verminderung / Minimierung des Lungenschadens</li> <li>▪ Sekretmobilisation</li> </ul> <p><b>Merke:</b> PatientInnen mit gleichzeitiger Reduktion des pCO<sub>2</sub> in Bauchlage zeigen nach 28 Tagen eine erhöhte Überlebensrate</p>                                                                                                                                                                                                                                                                                       |
| <b>Zeit und Dauer</b>   | <p>Bauchlagerung frühzeitig erwägen:</p> <ul style="list-style-type: none"> <li>▪ mindestens 12 h, optimalerweise auf 16h erweitern</li> <li>▪ 4h Pause, ggf. erneute Bauchlagerung für mind. 12h</li> </ul>                                                                                                                                                                                                                                                                                                                                                                                                                                                                                                              |
| <b>Ende</b>             | <ul style="list-style-type: none"> <li>▪ anhaltende Verbesserung der Oxygenierung in Rückenlage (4 Stunden nach Rücklagerung: PaO<sub>2</sub>/FIO<sub>2</sub> <math>\geq 150</math> bei einem PEEP <math>\leq 10</math> cm H<sub>2</sub>O und einer FiO<sub>2</sub> <math>\leq 0,6</math>)</li> <li>▪ nach zwei erfolglosen Lagerungsversuchen</li> <li>▪ Individuelle Indikation in Betracht ziehen und eine Evaluation eines weiteren Bauchlageversuchs zu einem späteren Zeitpunkt vornehmen</li> </ul>                                                                                                                                                                                                                |
| <b>Komplikationen</b>   | <ul style="list-style-type: none"> <li>▪ 20-30 % Gesichtssödeme</li> <li>▪ ca. 30% Druckulzera des Gesichts, Knie und / oder Becken</li> <li>▪ „Nicht - Toleranz“ der Beatmung (Husten, Pressen, Beatmungskomplikationen)<br/>→ Sedierung adaptieren, Relaxierung in Betracht ziehen</li> </ul>                                                                                                                                                                                                                                                                                                                                                                                                                           |
| <b>Pflege</b>           | <ul style="list-style-type: none"> <li>▪ Umlagerung der Extremitäten und des Kopfes möglich</li> <li>▪ Mikrolagerungen durchführen</li> <li>▪ Sichere Fixierung / Abpolsterung der Zu- und Ableitungen</li> <li>▪ Vor und nach der Bauchlage angemessene und sorgfältige Hautpflege durchführen</li> </ul>                                                                                                                                                                                                                                                                                                                                                                                                                |

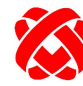

|                         |                                                                                                                                                                                                                                                                                                                                                      |
|-------------------------|------------------------------------------------------------------------------------------------------------------------------------------------------------------------------------------------------------------------------------------------------------------------------------------------------------------------------------------------------|
|                         | <ul style="list-style-type: none"><li>▪ Gesichtsödeme lassen sich durch eine Schräglage des Bettes eindämmen → <i>CAVE</i>: Kreislaufreaktion berücksichtigen</li><li>▪ Endotracheales Absaugen nach Bedarf möglich</li><li>▪ Enterale Ernährung mit 30ml/h und engmaschigen Refluxkontrollen (4-stdl.) möglich</li></ul>                            |
| <b>Lagerungsschäden</b> | Plexus Brachialis: Arm nicht mehr als 90 Grad auslagern<br>Auge: Abtasten ob Bulbi freiliegen, Augen mit hautfreundlichem Pflaster abkleben, Gelkissen verwenden                                                                                                                                                                                     |
| <b>Awake- Proning</b>   | <ul style="list-style-type: none"><li>▪ Starke Empfehlung der S3 Leitlinie für COVID-19 PatientInnen</li><li>▪ Keine Reduktion des Mortalitätsrisikos, jedoch eine Reduktion der Intubationsindikation</li><li>▪ Bauchlage bei PatientInnen im Wachzustand ist nebenwirkungsarm</li><li>▪ Dauer: 1h bis maximale Toleranz der PatientInnen</li></ul> |

## Checkliste Bauchlage

### Vorbereitung:

|                                           |                                                                                                                                                                                                                                                                                                                                                                                                                                                                                                                                                                                                                                                                                          |
|-------------------------------------------|------------------------------------------------------------------------------------------------------------------------------------------------------------------------------------------------------------------------------------------------------------------------------------------------------------------------------------------------------------------------------------------------------------------------------------------------------------------------------------------------------------------------------------------------------------------------------------------------------------------------------------------------------------------------------------------|
| <b>Augenpflege</b>                        | <input type="checkbox"/> Durchführen<br><input type="checkbox"/> Ggf. Augen mit dünnem Pflaster verschließen, um kompletten Lidschluss zu gewährleisten                                                                                                                                                                                                                                                                                                                                                                                                                                                                                                                                  |
| <b>Nasenpflege</b>                        | <input type="checkbox"/> Durchführen<br><input type="checkbox"/> Fixierung der Magensonde ggf. erneuern                                                                                                                                                                                                                                                                                                                                                                                                                                                                                                                                                                                  |
| <b>Mundpflege</b>                         | <input type="checkbox"/> Durchführen<br><input type="checkbox"/> weiche, sichere Tubusfixierung wählen<br><input type="checkbox"/> Ausstreichen der Mundspeicheldrüsen in Erwägung ziehen<br><input type="checkbox"/> geschlossene Absaugung konnektieren                                                                                                                                                                                                                                                                                                                                                                                                                                |
| <b>Vorbeugen von Gesichtsulzerationen</b> | <input type="checkbox"/> AutorInnen empfehlen das Abpolstern der druckulzerationsgefährdeten Stellen mittels Schaumverbänden (Stirn, Wangenknochen, Kinn und prominent vorstehende Gelenke)                                                                                                                                                                                                                                                                                                                                                                                                                                                                                              |
| <b>Beatmung</b>                           | <input type="checkbox"/> Cuffdruckkontrolle & Auskultation<br><input type="checkbox"/> auf ausreichende Länge des Beatmungsschlauches achten<br><input type="checkbox"/> ggf. Gänsegurgel verwenden<br><input type="checkbox"/> FiO <sub>2</sub> auf 1,0<br><input type="checkbox"/> Beatmungsbeutel einsatzbereit & an Sauerstoff angeschlossen                                                                                                                                                                                                                                                                                                                                         |
| <b>Verbände</b>                           | <input type="checkbox"/> Wechsel notwendig?<br><input type="checkbox"/> Intervalle beachten                                                                                                                                                                                                                                                                                                                                                                                                                                                                                                                                                                                              |
| <b>Zu- und Ableitungen</b>                | <input type="checkbox"/> sorgfältig fixieren & ggf. Unterpolstern / Leitungen verlängern<br><input type="checkbox"/> Ableitungsbeutel leeren<br><input type="checkbox"/> Leitungen kopfwärts legen<br><input type="checkbox"/> Nicht notwendige Zugangsleitung für die Umpositionierung entfernen                                                                                                                                                                                                                                                                                                                                                                                        |
| <b>Monitoring</b>                         | <input type="checkbox"/> Alarmgrenzen Patientenbezogen einstellen<br><input type="checkbox"/> Pulstonquelle auf SpO <sub>2</sub> und Lautstärke auf mind. 10% stellen<br><input type="checkbox"/> EKG- Quelle auf Arterie oder automatisch setzen<br><input type="checkbox"/> EKG Elektroden anterior/ventral entfernen<br><input type="checkbox"/> Vorbereiten der Neupositionierung der Elektroden nach posterior<br><input type="checkbox"/> Nicht relevante Monitorkabel für die Umpositionierung entfernen (griffbereit lassen)<br><input type="checkbox"/> SpO <sub>2</sub> Messung auf die nach oben führende Seite legen (kontinuierliche Messung während der Drehung anstreben) |
| <b>Enterale Ernährung</b>                 | <input type="checkbox"/> Stoppen<br><input type="checkbox"/> Magensonde via Absaugung entleeren<br><input type="checkbox"/> Sekretablaufbeutel zur Entlastung anschließen                                                                                                                                                                                                                                                                                                                                                                                                                                                                                                                |
| <b>Analgesie &amp; Sedierung</b>          | <input type="checkbox"/> RASS -4 für die Umpositionierung empfohlen<br><input type="checkbox"/> Bolusgaben der Sedierung in 10 ml Spritzen bereithalten, zum zeitnahen titrieren<br><input type="checkbox"/> ggf. Muskelrelaxanzien in Betracht ziehen<br>CAVE: Tubustoleranz anstreben<br>CAVE: Spontanatmung während der Bauchlage anstreben                                                                                                                                                                                                                                                                                                                                           |
| <b>Notfallequipment</b>                   | <input type="checkbox"/> Noradrenalin 1mg verdünnt auf 100ml ( $\hat{=}$ 10 $\mu$ g/ml)<br><input type="checkbox"/> Noradrenalinperfusor am venösen Zugang anlaufen lassen (MAP von >65mmHg), wenn nicht bereits vorhanden                                                                                                                                                                                                                                                                                                                                                                                                                                                               |



|                             |                                                                                                                                                                                                                                                                                                                                                                                                                                                                                                                                           |
|-----------------------------|-------------------------------------------------------------------------------------------------------------------------------------------------------------------------------------------------------------------------------------------------------------------------------------------------------------------------------------------------------------------------------------------------------------------------------------------------------------------------------------------------------------------------------------------|
|                             | <ul style="list-style-type: none"><li><input type="checkbox"/> Reintubationsmaterial bereithalten (schwieriger Atemweg?)<br/>(→ siehe Intubationscheckliste)</li></ul>                                                                                                                                                                                                                                                                                                                                                                    |
| <b>Lagerungsmaterialien</b> | <ul style="list-style-type: none"><li><input type="checkbox"/> Kopfschale für die Bauchlage mit Spiegel in Betracht ziehen</li><li><input type="checkbox"/> Gelkissen vorhanden?</li><li><input type="checkbox"/> Knierolle</li><li><input type="checkbox"/> Abpolsterung von Druckulzerationsgefährdeten Stellen<br/>mittels Schaumverbänden in Betracht ziehen</li><li><input type="checkbox"/> Bei inkompletter Bauchlage (Bettdecke vorfalten, Stillkissen<br/>bereithalten)</li></ul> <p><i>CAVE:</i> Keine Handtücher verwenden</p> |

## Durchführung:

|                   |                                                                                                                                                                                                                                                                                       |
|-------------------|---------------------------------------------------------------------------------------------------------------------------------------------------------------------------------------------------------------------------------------------------------------------------------------|
| <b>Teamstärke</b> | <input type="checkbox"/> mind. 3 Pflgende<br><input type="checkbox"/> mind. ein Arzt/ Ärztin                                                                                                                                                                                          |
| <b>Technik</b>    | <input type="checkbox"/> Im Team vor Beginn für eine Umpositionierungstechnik entscheiden<br><input type="checkbox"/> Bei der Zweilakentechnik Laken bereithalten                                                                                                                     |
| <b>Besprechen</b> | <input type="checkbox"/> Vorbereitungen durchgehen<br><input type="checkbox"/> Jedes Teammitglied kennt seine Aufgabe<br><input type="checkbox"/> Kommando besprechen<br><input type="checkbox"/> Andere Teammitglieder, die nicht mit an der Umpositionierung mitwirken, informieren |
| <b>Aufgaben</b>   | <input type="checkbox"/> Tubus / Beatmung / Gesicht?<br><input type="checkbox"/> Zu- und Ableitungen sicher?<br><input type="checkbox"/> Monitoring / Alarmgrenzen?<br><input type="checkbox"/> Extremitätenlagerung (CAVE: Plexusschäden)?                                           |

## Nachbereitung:

|                                  |                                                                                                                                                                                                                                                                                                                                                                                                                                                                                                                                                                                                                                                |
|----------------------------------|------------------------------------------------------------------------------------------------------------------------------------------------------------------------------------------------------------------------------------------------------------------------------------------------------------------------------------------------------------------------------------------------------------------------------------------------------------------------------------------------------------------------------------------------------------------------------------------------------------------------------------------------|
| <b>Augenpflege</b>               | <input type="checkbox"/> Bulbi kontrollieren                                                                                                                                                                                                                                                                                                                                                                                                                                                                                                                                                                                                   |
| <b>Nasenpflege</b>               | <input type="checkbox"/> Fixierung und Lage der Magensonde kontrollieren                                                                                                                                                                                                                                                                                                                                                                                                                                                                                                                                                                       |
| <b>Mundpflege</b>                | <input type="checkbox"/> Tubusfixierung kontrollieren                                                                                                                                                                                                                                                                                                                                                                                                                                                                                                                                                                                          |
| <b>Beatmung</b>                  | <input type="checkbox"/> Cuffdruckkontrolle<br><input type="checkbox"/> Tubuslagekontrolle & Auskultation (Zahnreihenkontrolle möglich?)<br><input type="checkbox"/> Arterielle BGA 30 Min. nach Umpositionierung<br><input type="checkbox"/> FiO <sub>2</sub> - Einstellung nach BGA adaptieren                                                                                                                                                                                                                                                                                                                                               |
| <b>Verbände</b>                  | <input type="checkbox"/> kontrollieren                                                                                                                                                                                                                                                                                                                                                                                                                                                                                                                                                                                                         |
| <b>Zu- und Ableitungen</b>       | <input type="checkbox"/> Kontrollieren, frei lagern, ggf. Unterpolstern<br><input type="checkbox"/> Zugangsleitungen komplettieren                                                                                                                                                                                                                                                                                                                                                                                                                                                                                                             |
| <b>Monitoring</b>                | <input type="checkbox"/> EKG Elektroden posterior anbringen<br><input type="checkbox"/> EKG im Monitor Neuerlernen<br><input type="checkbox"/> EKG-Quelle auf EKG setzen, Ableitungen II & V wählen (zur Beurteilung der ST-Strecke; CAVE: diese ist jetzt „gespiegelt“)<br><input type="checkbox"/> Monitoring komplettieren<br><input type="checkbox"/> Nullabgleich aller invasiven Druckmessungen<br><input type="checkbox"/> Abdominelle Druckmessung in Betracht ziehen                                                                                                                                                                  |
| <b>Enterale Ernährung</b>        | <input type="checkbox"/> Bis 30ml/h<br><input type="checkbox"/> 4 - stündliche Refluxkontrollen                                                                                                                                                                                                                                                                                                                                                                                                                                                                                                                                                |
| <b>Analgesie &amp; Sedierung</b> | <input type="checkbox"/> RASS -2/ -3 empfohlen<br><input type="checkbox"/> ggf. Muskelrelaxation in Betracht ziehen (RASS-Evaluation)<br>CAVE: Tubustoleranz & Spontanatmung anstreben                                                                                                                                                                                                                                                                                                                                                                                                                                                         |
| <b>Lagerung</b>                  | <input type="checkbox"/> Gelenke frei lagern oder weich unterpolstern<br><input type="checkbox"/> Mikrolagerung der Extremitäten und des Kopfes (Parotitisprophylaxe)<br><input type="checkbox"/> Bei inkompletter Bauchlage einen Seitenwechsel nach 8h durchführen<br><input type="checkbox"/> Anti – Trendelenburg - Lage unter Kreislaufberücksichtigung in Erwägung ziehen <ul style="list-style-type: none"> <li>○ Reduzierung der Gesichtssödeme</li> <li>○ Verbesserung der Oxygenierung</li> <li>○ Reduzierte Atemarbeit</li> <li>○ Reduktion des Risikos einer Aspiration</li> <li>○ Reduktion des intrazerebralen Drucks</li> </ul> |

|                      |                                                                                                                                                                                                                                                                                                                                                                                                                                                                                                                                                                                                                                      |
|----------------------|--------------------------------------------------------------------------------------------------------------------------------------------------------------------------------------------------------------------------------------------------------------------------------------------------------------------------------------------------------------------------------------------------------------------------------------------------------------------------------------------------------------------------------------------------------------------------------------------------------------------------------------|
| <b>Dokumentation</b> | <ul style="list-style-type: none"><li><input type="checkbox"/> Dokumentation der Bauchlage</li><li><input type="checkbox"/> BGAs mit Berücksichtigung der Messwerte</li><li><input type="checkbox"/> FiO<sub>2</sub> und ggf. Temperaturkorrektur beim Einpflegen der BGA eingeben, um einen Horowitz-Quotienten zu ermitteln, ggf. errechnen (Formel s.o.)</li><li><input type="checkbox"/> Horowitz-Quotienten in der Tageskurve notieren</li><li><input type="checkbox"/> AutorInnen der Checkliste empfehlen die Erstellung eines Bauchlagerungsprotokolls zur Dokumentation von Lagerungsrhythmen und Mikrolagerungen</li></ul> |
|----------------------|--------------------------------------------------------------------------------------------------------------------------------------------------------------------------------------------------------------------------------------------------------------------------------------------------------------------------------------------------------------------------------------------------------------------------------------------------------------------------------------------------------------------------------------------------------------------------------------------------------------------------------------|

### **Verfasser:**

Vanessa Erbes, B.A.

Fachgesundheits- und Krankenpflegerin für Intensivpflege und Anästhesie

Mitglied Deutsche Gesellschaft für Internistische Intensivmedizin und Notfallmedizin (DGIIN)

Tobias Ochmann

Fachgesundheits- und Krankenpfleger für Intensivpflege und Anästhesie

Stellv. Sprecher Sektion Pflege

Deutsche Gesellschaft für Internistische Intensivmedizin und Notfallmedizin (DGIIN)

Carsten Hermes

Fachgesundheits- und Krankenpfleger für Intensivpflege und Anästhesie

Sprecher Sektion Pflege

Deutsche Gesellschaft für Internistische Intensivmedizin und Notfallmedizin (DGIIN)

### **Download aktuellste Version**

**<https://dgiin.de/pflege.html>**

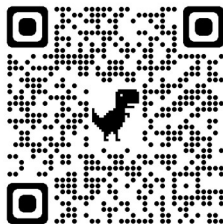

## Literatur:

- Deutsche Gesellschaft für Anästhesiologie und Intensivmedizin e.V. (DGAI) (2023). S3-Leitlinie: „Lagerungstherapie und Mobilisation von kritisch Erkrankten auf Intensivstation <https://www.awmf.org/leitlinien/detail/II/001-015.html> (letzter Aufruf: 23.03.2020)
- Deutsche Gesellschaft für Anästhesiologie und Intensivmedizin (DGAI) (2017). S3-Leitlinie Invasive Beatmung und Einsatz extrakorporaler Verfahren bei akuter respiratorischer Insuffizienz unter: <https://www.awmf.org/leitlinien/detail/II/001-021.html> (letzter Aufruf: 23.03.2020)
- Gattinoni, L., Vagginelli, F., Carlesso, E. Taccone, P., Conte, V. Chiumello, D., Valenza, F., Caironi, P., Pesenti, A. (2004). Decrease in PaCO<sub>2</sub> with prone position is predictive of improved outcome in acute respiratory distress syndrome. *Critical care medicine*. 31. 2727-33.
- Hermes, C.; Müller- Wolf, T. (2016): Arbeitsplatz und Patient: von der Vorbereitung bis zur Ausleitung. In: *Anästhesie und Intensivmedizin für die Fachpflege*. Larsen, R. (Hrsg.). 9. Vollständige überarbeitete Auflage. Springer Verlag. Berlin Heidelberg
- Hermes, C., Nydahl, P., Henzler, D., Bein, T. (2016). Lagerungstherapie und Frühmobilisation auf der Intensivstation: Erkenntnisse aus der aktuellen Leitlinie 2015. *Medizinische Klinik - Intensivmedizin und Notfallmedizin*.
- Krüger, L. (2017): Mobilisation und Lagerung In: *Klinikleitfaden Intensivpflege*. Knipfer, E.; Koche, E. (Hrsg.) 6. Auflage. Urban und Fischer. München
- Peko, L., Barakat- Johnson, M., Gefen, A. (2020): Protecting prone positioned patients from facial pressure ulcers using prophylactic dressings: A timely biomechanical analysis in the context of the COVID- 19 pandemic. *Wiley Online Liberay*. 1595- 1606
- Vogt, T., Sensen, B., Kluge, S. (2019). Bauchlagerung bei Beatmung – Schritt für Schritt. *DMW - Deutsche Medizinische Wochenschrift*. 144. 978-981.
