# Supplementary material for: Handlungsalgorithmus: Bauchpositionierung bei kritisch kranken Patienten
Source: Springer Nature journal article supplement (doi:10.1007/s00063-024-01146-8), 2024-05-08
Supplement: MOESM2 [file 27068766]

**Allgemeines zur dokumentierten Bauchlage**

Patientenetikett

**Laufende Nummer** \_\_\_\_\_ **Beginn:** \_\_\_\_\_ (Datum, Uhrzeit)  
**Ende:** \_\_\_\_\_ (Datum, Uhrzeit)

**Position**  180°  135° → Begründung: \_\_\_\_\_

**Hautdefekte bereits vorhanden**  ja  nein (→ wenn ja, dann Beschreibung auf Seite 2)

**Katecholamintherapie**  ja  nein

**Patientenvorbereitung**

**Augen**  Augensalbe  Augenpflaster  sonstiges \_\_\_\_\_

**Polsterung gefährdeter Hautareale**  Kinn  Stirn  sonstiges \_\_\_\_\_  
 mehrlagiger Schaumverband  Produkt: \_\_\_\_\_

**Beatmungszugang**  Tubus  TK  NIV  HFNC  
 weiches Tubusband  Maske / Kanüle/ Nasenbrille gepolstert  
 Zu- & Ableitungen gepolstert

**Eingesetzte Lagerungsmaterialien**

**Thorax** \_\_\_\_\_ Decken \_\_\_\_\_ Kissen  + PUR\*-Schaum Matte

**Becken** \_\_\_\_\_ Decken \_\_\_\_\_ Kissen  + PUR-Schaum Matte

**Körper**  spezielles Polsterset  + PUR-Schaum Matte  Thorax  Becken  Arme  
 Spezialbett: \_\_\_\_\_  Spezialmatratze: \_\_\_\_\_

**Kopf**  PUR-Schaum Kissen (Bezeichnung: \_\_\_\_\_ )  
 Kopfschale mit Schaumstoffeinsatz (Bezeichnung: \_\_\_\_\_ , Größe: \_\_\_\_\_ )

**Mikrolagerung Kopf / Arme / Beine**

| Uhrzeit | 01:___                   | 02:___                   | 03:___                   | 04:___                   | 05:___                   | 06:___                   | 07:___                   | 08:___                   | 09:___                   | 10:___                   | 11:___                   | 12:___                   |
|---------|--------------------------|--------------------------|--------------------------|--------------------------|--------------------------|--------------------------|--------------------------|--------------------------|--------------------------|--------------------------|--------------------------|--------------------------|
| #       | <input type="checkbox"/> | <input type="checkbox"/> | <input type="checkbox"/> | <input type="checkbox"/> | <input type="checkbox"/> | <input type="checkbox"/> | <input type="checkbox"/> | <input type="checkbox"/> | <input type="checkbox"/> | <input type="checkbox"/> | <input type="checkbox"/> | <input type="checkbox"/> |
| Hdz.    |                          |                          |                          |                          |                          |                          |                          |                          |                          |                          |                          |                          |
| Uhrzeit | 13:___                   | 14:___                   | 15:___                   | 16:___                   | 17:___                   | 18:___                   | 19:___                   | 20:___                   | 21:___                   | 22:___                   | 23:___                   | 24:___                   |
| #       | <input type="checkbox"/> | <input type="checkbox"/> | <input type="checkbox"/> | <input type="checkbox"/> | <input type="checkbox"/> | <input type="checkbox"/> | <input type="checkbox"/> | <input type="checkbox"/> | <input type="checkbox"/> | <input type="checkbox"/> | <input type="checkbox"/> | <input type="checkbox"/> |
| Hdz.    |                          |                          |                          |                          |                          |                          |                          |                          |                          |                          |                          |                          |

\* PUR-Schaum = Polyurethanschaum mit nachlassender Druckspannung  
# = Augen, Nase, Ohren & Kehlkopf frei gelagert

|                  |       |
|------------------|-------|
| Patientenetikett | Datum |
|------------------|-------|

**Beurteilung vor der Bauchlage**

**Hautdefekte**  
(Größe / Lokalisation)

---

---

---

---

---

---

---

---

**sonstiges**

---

---

**Beurteilung nach der Bauchlage**

**Hautdefekte**  
(Größe / Lokalisation)

---

---

---

---

---

---

---

---

**sonstiges**

---

---

**Dokumentation angelegt**

ja

nein

inkl. Fotodokumentation

**Verfasser:**

Ricardo Klimpel  
Fachkrankenschwester für Intensivpflege und Anästhesie / Praxisanleitungskordinator Intensivpflege  
Deutsche Gesellschaft für Internistische Intensivmedizin und Notfallmedizin (DGIIN)

Tobias Ochmann (M. Sc.)  
Pflegeexperte APN / Fachkrankenschwester für Intensivpflege und Anästhesie  
Stellv. Sprecher Sektion Pflege  
Deutsche Gesellschaft für Internistische Intensivmedizin und Notfallmedizin (DGIIN)

Carsten Hermes (M. Sc.)  
Pflegewissenschaftler, APN / Fachkrankenschwester für Intensivpflege und Anästhesie  
Sprecher Sektion Pflege  
Deutsche Gesellschaft für Internistische Intensivmedizin und Notfallmedizin (DGIIN)
